# Supplementary material for: Pathways to healing: Plants with therapeutic potential for neurodegenerative diseases
Source: PubMed Central journal article supplement — IBRO Neurosci Rep. 2023 Feb 10;14:210–34. doi: 10.1016/j.ibneur.2023.01.006 (PMC9984566; doi:10.1016/j.ibneur.2023.01.006), 2023-02-10
Supplement: mmc4.pdf [file mmc4.pdf]

**Supplementary Table 4** Plant bioactivities and their phytochemical extracts of ND relevance demonstrated in human clinical studies

| Bioactivity                              | Species                                                                                                                                                                                                                                                                                                                                                                                                                                                                                                                                                                                                                                                                                      | Reference                                                                                                                                                                                                                                                                                                                                                                                                                                                                                                                                                                                                                                                      |
|------------------------------------------|----------------------------------------------------------------------------------------------------------------------------------------------------------------------------------------------------------------------------------------------------------------------------------------------------------------------------------------------------------------------------------------------------------------------------------------------------------------------------------------------------------------------------------------------------------------------------------------------------------------------------------------------------------------------------------------------|----------------------------------------------------------------------------------------------------------------------------------------------------------------------------------------------------------------------------------------------------------------------------------------------------------------------------------------------------------------------------------------------------------------------------------------------------------------------------------------------------------------------------------------------------------------------------------------------------------------------------------------------------------------|
| Anti-bacterial                           | <i>Malus sylvestris</i>                                                                                                                                                                                                                                                                                                                                                                                                                                                                                                                                                                                                                                                                      | Ihsan et al., 2018                                                                                                                                                                                                                                                                                                                                                                                                                                                                                                                                                                                                                                             |
| Anti-DNA damage/improved DNA repair      | <i>Olea europaea</i><br><i>Uncaria tomentosa</i>                                                                                                                                                                                                                                                                                                                                                                                                                                                                                                                                                                                                                                             | Salvini et al., 2006<br>Sheng et al., 2001                                                                                                                                                                                                                                                                                                                                                                                                                                                                                                                                                                                                                     |
| Anti-hypertensive                        | <i>Achillea santolinoides</i><br><i>Allium cepa</i><br><i>Allium sativum</i><br><i>Alstonia scholaris</i><br><i>Beta vulgaris</i><br><i>Cinnamomum cassia*</i><br><i>Crataegus curvisepala</i><br><i>Fagopyrum esculentum</i><br><i>Hibiscus sabdariffa</i><br><i>Leonurus cardiaca</i><br><i>Mentha longifolia</i><br><i>Olea europaea</i><br><i>Panax quinquefolius</i><br><i>Phyllanthus emblica</i><br><i>Pisum sativum</i><br><i>Prunella vulgaris</i><br><i>Punica granatum</i><br><i>Solanum lycopersicum</i><br><i>Solanum tuberosum</i><br><i>Theobroma cacao</i><br><br><i>Urtica dioica</i><br><i>Viola odorata</i>                                                               | Asgary et al., 2000<br>Brüll et al., 2015<br>Ried et al., 2010<br>Bhogayata et al., 2009<br>Raubenheimer et al., 2017<br>Akilen et al., 2010<br>Asgary et al., 2004<br>Zhang HW et al., 2007<br>Nwachukwu et al., 2015<br>Shikov et al., 2011<br>Samaha et al., 2019<br>Susalit et al., 2011<br>Mucalo et al., 2013<br>Ghaffari et al., 2020<br>Li H et al., 2011b<br>Zheng H, 2018<br>Asgary et al., 2013<br>Paran et al., 2009<br>Vinson et al., 2012<br>Taubert et al., 2007<br>Desideri et al., 2012<br>Samaha et al., 2019<br>Samaha et al., 2019                                                                                                         |
| Anti-hyperlipidemic/cholesterol-lowering | <i>Achillea santolinoides</i><br><i>Agrimonia eupatoria</i><br><i>Chenopodium quinoa</i><br><i>Fagopyrum esculentum</i><br><i>Olea europaea</i><br><i>Punica granatum</i><br><i>Salvia officinalis</i>                                                                                                                                                                                                                                                                                                                                                                                                                                                                                       | Asgary et al., 2000<br>Ivanova et al., 2013<br>De Carvalho et al., 2014<br>Zhang HW et al., 2007<br>Verhoeven et al., 2015<br>Kojadinovic et al., 2017<br>Kianbakht et al., 2011                                                                                                                                                                                                                                                                                                                                                                                                                                                                               |
| Anti-inflammatory                        | <i>Agrimonia eupatoria</i><br><i>Aloe vera</i><br><i>Ananas comosus</i><br><br><i>Andrographis paniculata</i><br><i>Bertholletia excelsa</i><br><i>Beta vulgaris</i><br><i>Boswellia serrata</i><br><i>Cinnamomum verum</i><br><i>Olea europaea</i><br><i>Passiflora edulis</i><br><i>Phyllanthus amarus</i><br><i>Prunella vulgaris</i><br><i>Punica granatum</i><br><i>Rosa canina</i><br><i>Sambucus ebulus</i><br><i>Scutellaria baicalensis</i><br><br><i>Solidago chilensis</i><br><i>Symphytum officinale</i><br><i>Tamarindus indica</i><br><i>Uncaria guianensis</i><br><i>Uncaria tomentosa</i><br><i>Urtica dioica</i><br><i>Zataria multiflora</i><br><i>Zingiber officinale</i> | Ivanova et al., 2013<br>Reddy et al., 2012<br>Akhtar et al., 2004<br>Ordesi et al., 2014<br>Sandborn et al., 2010<br>Stockler-Pinto et al., 2014<br>Raubenheimer et al., 2017<br>Sontakke et al., 2007<br>Zareie et al., 2020<br>Lockyer et al., 2015<br>Farid et al., 2010<br>Decha et al., 2019<br>Song YW et al., 2007<br>Ghavipour et al., 2017<br>Warholm et al., 2003<br>Jabbari et al., 2016<br>Arweiler et al., 2011<br>Orzechowska et al., 2014<br>da Silva et al., 2010<br>Petersen et al., 1993<br>Rao PS et al., 2019<br>Piscoya et al., 2001<br>Mur E et al., 2002<br>Jacquet et al., 2009<br>Ariaee et al., 2018<br>Kulkarni and Deshpande, 2016 |
| Anti-oxidant                             | <i>Campomanesia speciosa</i><br><i>Olea europaea</i>                                                                                                                                                                                                                                                                                                                                                                                                                                                                                                                                                                                                                                         | Viecili et al., 2014]<br>Oliveras-López et al., 2013                                                                                                                                                                                                                                                                                                                                                                                                                                                                                                                                                                                                           |
| Anti-PD                                  | <i>Apium graveolens</i><br><i>Glycyrrhiza glabra</i><br><i>Mucuna pruriens</i>                                                                                                                                                                                                                                                                                                                                                                                                                                                                                                                                                                                                               | Zhou H et al., 2019<br>Petramfar et al., 2010<br>Katzenschlager et al., 2004]                                                                                                                                                                                                                                                                                                                                                                                                                                                                                                                                                                                  |
| Anti-viral                               | <i>Ficus carica</i><br><i>Glycyrrhiza glabra</i>                                                                                                                                                                                                                                                                                                                                                                                                                                                                                                                                                                                                                                             | Bohlooli et al., 2007<br>Mori et al., 1990                                                                                                                                                                                                                                                                                                                                                                                                                                                                                                                                                                                                                     |

|                                                                                                    |                                                                                                                                                                                                                                                                                                                                                                                                                                                                                                                                 |                                                                                                                                                                                                                                                                                                                                                                                                                                                                                                                                                                          |
|----------------------------------------------------------------------------------------------------|---------------------------------------------------------------------------------------------------------------------------------------------------------------------------------------------------------------------------------------------------------------------------------------------------------------------------------------------------------------------------------------------------------------------------------------------------------------------------------------------------------------------------------|--------------------------------------------------------------------------------------------------------------------------------------------------------------------------------------------------------------------------------------------------------------------------------------------------------------------------------------------------------------------------------------------------------------------------------------------------------------------------------------------------------------------------------------------------------------------------|
|                                                                                                    | <i>Myrtus communis</i><br><i>Pelargonium sidoides*</i><br><i>Rosa canina</i><br><i>Sambucus nigra</i><br><br><i>Zingiber officinale</i>                                                                                                                                                                                                                                                                                                                                                                                         | Minaei et al., 2014]<br>Lizogub et al., 2007<br>Winther et al., 2018]<br>Zakay-Rones et al., 2004<br>Hawkins et al., 2019<br>San Chang et al., 2013                                                                                                                                                                                                                                                                                                                                                                                                                      |
| Anxiolytic/mood modulation                                                                         | <i>Lactuca serriola</i><br><i>Matricaria chamomilla</i><br><i>Melissa officinalis</i><br><i>Valeriana officinalis</i><br><i>Withania somnifera</i>                                                                                                                                                                                                                                                                                                                                                                              | Ghazala et al., 2009<br>Amsterdam et al., 2009<br>Kennedy et al., 2002<br>Gharib et al., 2015<br>Lopresti et al., 2019                                                                                                                                                                                                                                                                                                                                                                                                                                                   |
| Cardioprotective/anti-congestive heart failure                                                     | <i>Terminalia arjuna</i>                                                                                                                                                                                                                                                                                                                                                                                                                                                                                                        | Dwivedi and Agarwal, 1994<br>Bharani et al., 1995                                                                                                                                                                                                                                                                                                                                                                                                                                                                                                                        |
| Cognitive/memory improvement                                                                       | <i>Acacia catechu*</i><br><i>Allium cepa</i><br><i>Bacopa monnieri</i><br><i>Boswellia serrata</i><br><i>Centella asiatica</i><br><i>Juglans regia</i><br><i>Melissa officinalis</i><br><i>Olea europaea</i><br><i>Panax quinquefolius</i><br><br><i>Rosmarinus officinalis</i><br><br><i>Salvia officinalis</i><br><br><i>Theobroma cacao</i><br><br><i>Tinospora cordifolia</i><br><i>Vaccinium angustifolium</i><br><i>Vaccinium sp.</i><br><i>Vitis vinifera</i><br><i>Withania somnifera</i><br><i>Zingiber officinale</i> | Yimam et al., 2016<br>Nakagawa et al., 2016<br>Kumar N et al., 2016<br>Taghizadeh et al., 2018<br>Wattanathorn et al., 2008<br>Arab and Ang, 2015<br>Perry NS et al., 2018<br>Valls-Pedret et al., 2015<br>Scholey et al., 2010<br>Ossoukhova et al., 2015<br>Nematollahi et al., 2018<br>Perry NS et al., 2018<br>Perry et al., 2003<br>Akhondzadeh et al., 2003<br>Taubert et al., 2007<br>Desideri et al., 2012<br>Bairy et al., 2004<br>Krikorian et al., 2010]<br>Whyte et al., 2018<br>Bensalem et al., 2019<br>Choudhary D et al., 2017<br>Saenghong et al., 2012 |
| Endothelial progenitor cell mobilization/ anti-platelet aggregation/ Improved endothelial function | <i>Apium graveolens</i><br><i>Campomanesia speciosa</i><br><i>Malus pumila</i><br><i>Zingiber officinale</i>                                                                                                                                                                                                                                                                                                                                                                                                                    | Zhao H et al., 2016<br>Otero et al., 2017<br>Bondonno et al., 2018<br>Young et al., 2006                                                                                                                                                                                                                                                                                                                                                                                                                                                                                 |
| GM1 Gangliosidosis reversed disease progression/increased survival                                 | <i>Morus alba</i>                                                                                                                                                                                                                                                                                                                                                                                                                                                                                                               | Deodato et al., 2017<br>Utz et al., 2017                                                                                                                                                                                                                                                                                                                                                                                                                                                                                                                                 |
| Immunostimulatory                                                                                  | <i>Panax japonicus</i>                                                                                                                                                                                                                                                                                                                                                                                                                                                                                                          | Hyun et al., 2021                                                                                                                                                                                                                                                                                                                                                                                                                                                                                                                                                        |
| Improved retinal function/glaucoma patients improved visual acuity                                 | <i>Camellia sinensis</i><br><i>Vaccinium myrtillus</i><br><i>Vitis vinifera</i>                                                                                                                                                                                                                                                                                                                                                                                                                                                 | Falsini et al., 2009<br>Shim et al., 2012<br>Richer et al., 2014                                                                                                                                                                                                                                                                                                                                                                                                                                                                                                         |
| Increased Nrf2                                                                                     | <i>Bertholletia excelsa</i>                                                                                                                                                                                                                                                                                                                                                                                                                                                                                                     | Cardozo et al., 2016                                                                                                                                                                                                                                                                                                                                                                                                                                                                                                                                                     |
| Improved neurological function in Friedreich's ataxia patients                                     | <i>Vitis vinifera</i>                                                                                                                                                                                                                                                                                                                                                                                                                                                                                                           | Yiu et al., 2015                                                                                                                                                                                                                                                                                                                                                                                                                                                                                                                                                         |
| Motor improvement                                                                                  | <i>Mucuna pruriens</i>                                                                                                                                                                                                                                                                                                                                                                                                                                                                                                          | Cilia et al., 2017                                                                                                                                                                                                                                                                                                                                                                                                                                                                                                                                                       |
| Reduced arterial stiffness                                                                         | <i>Carthamus tinctorius</i>                                                                                                                                                                                                                                                                                                                                                                                                                                                                                                     | Suzuki et al. 2010                                                                                                                                                                                                                                                                                                                                                                                                                                                                                                                                                       |
| Reduced CSF amyloid $\beta$ 40                                                                     | <i>Vitis vinifera</i> [resveratrol]                                                                                                                                                                                                                                                                                                                                                                                                                                                                                             | Turner et al., 2015                                                                                                                                                                                                                                                                                                                                                                                                                                                                                                                                                      |
| Neurogenic                                                                                         | <i>Aloe vera</i>                                                                                                                                                                                                                                                                                                                                                                                                                                                                                                                | Malayeri et al., 2021                                                                                                                                                                                                                                                                                                                                                                                                                                                                                                                                                    |
| NPC disease increased survival                                                                     | <i>Morus alba</i>                                                                                                                                                                                                                                                                                                                                                                                                                                                                                                               | Walterfang et al., 2012<br>Patterson et al., 2020                                                                                                                                                                                                                                                                                                                                                                                                                                                                                                                        |
| Reduced MS disease activity                                                                        | <i>Boswellia spp</i><br><i>Fumaria officinalis</i> [dimethyl fumarate]                                                                                                                                                                                                                                                                                                                                                                                                                                                          | Stürner et al., 2018]<br>Fernández et al., 2017                                                                                                                                                                                                                                                                                                                                                                                                                                                                                                                          |
| Reduced symptoms of fatigue                                                                        | <i>Panax quinquefolius</i>                                                                                                                                                                                                                                                                                                                                                                                                                                                                                                      | Barton et al., 2013                                                                                                                                                                                                                                                                                                                                                                                                                                                                                                                                                      |
| Wound healing                                                                                      | <i>Calendula arvensis</i><br><i>Calendula officinalis</i><br><i>Pelargonium roseum</i><br><i>Withania somnifera</i>                                                                                                                                                                                                                                                                                                                                                                                                             | Lavagna et al., 2001<br>Pommier et al., 2004<br>Panah et al., 2012<br>Sheoran et al., 2020                                                                                                                                                                                                                                                                                                                                                                                                                                                                               |

\* sister species

References can be found in Supplementary File 7: References
